# Supplementary material
Source: PubMed Central journal article supplement (PMC6179355)
Supplement: NIHMS940823-supplement-Supplementary_Guide.pdf [file NIHMS940823-supplement-Supplementary_Guide.pdf]

**Supplementary Table 1: Clinical and experimental demographics of human specimens used in this study.** IHC = immunohistochemistry; EM = transmission electron microscopy

**Supplementary Table 2: Macaque tissue samples used in this study.**

**Supplementary Table 3: Primary Antibodies Used**

**Supplementary Table 4: Macaque Brdu Treatments and Quantification**

**Supplementary Video 1: 3D rendering of the dorsal hippocampus at 14 GW.** The developing dentate gyrus (blue), CA region (orange), dentate neuroepithelium (yellow) are shown and each colored dot represents the presence of Ki67+ (green), SOX2+ (red), and PAX6+ (white) cells.

File size: 12 MB

**Supplementary Discussion**

**Supplementary References**
