# Supplementary material
Source: PubMed Central journal article supplement (PMC6179355)
Supplement: NIHMS940823-supplement-Supplementary_Material.pdf [file NIHMS940823-supplement-Supplementary_Material.pdf]

Supplementary Table 1

**CONTROL**

| <b>Case No.</b> | <b>Age</b>  | <b>Gender</b> | <b>Experimental Use</b> | <b>Clinical History</b>                                            |
|-----------------|-------------|---------------|-------------------------|--------------------------------------------------------------------|
| 1               | 14GW        | F             | IHC, mapping            | spontaneous abortion                                               |
| 2               | 17GW        | M             | IHC                     | amniotic infection                                                 |
| 3               | 17GW        | F             | IHC                     | spontaneous abortion                                               |
| 4               | 22GW        | M             | IHC                     | spontaneous abortion                                               |
| 5               | 22GW        | M             | IHC, mapping            | urethral stenosis                                                  |
| 6               | 22GW        | F             | IHC,EM                  | spontaneous abortion                                               |
| 7               | 27GW        | F             | IHC                     | bacterial pneumonia                                                |
| 8               | 38GW (term) | M             | IHC, mapping            | Bronchopulmonary dysplasia                                         |
| 9               | term        | M             | IHC                     | Respiratory failure                                                |
| 10              | term        | M             | IHC                     | chondrodysplasia                                                   |
| 11              | term        | M             | IHC                     | congenital malformations with diaphragmatic hernia                 |
| 12              | 2 days      | F             | EM                      | sepsis                                                             |
| 13              | 10 days     | F             | IHC                     | atypical motor neuron disease                                      |
| 14              | 3 weeks     | M             | IHC, mapping            | cardiac malformations                                              |
| 15              | 1 month     | F             | IHC, mapping            | cardiovascular malformation                                        |
| 16              | 6 month     | M             | IHC, mapping            | Tetralogy of Fallot, pneumonia                                     |
| 17              | 7 month     | M             | IHC                     | Wiskott-Aldrich Syndrome                                           |
| 18              | 1 year      | F             | IHC, mapping            | aspiration pneumonia                                               |
| 19              | 7 years     | M             | IHC, EM, mapping        | septic shock                                                       |
| 20              | 13 years    | M             | IHC, EM, mapping        | focal segmental glomerulosclerosis                                 |
| 21              | 18 years    | M             | EM                      | unknown                                                            |
| 22              | 19 years    | M             | IHC                     | systemic fungal infection                                          |
| 23              | 25 years    | M             | EM                      | unknown                                                            |
| 24              | 35 years    | M             | IHC, EM, mapping        | heart failure                                                      |
| 25              | 36 years    | M             | IHC                     | interstitial pulmonary fibrosis                                    |
| 26              | 39 years    | M             | IHC                     | pulmonary failure                                                  |
| 27              | 40 years    | F             | EM                      | ACM ictus                                                          |
| 28              | 44 years    | F             | EM                      | Cerebral hemorrhage from right carotid aneurysm                    |
| 29              | 48 years    | M             | EM                      | autoimmune nephritis post transplant                               |
| 30              | 52 years    | F             | IHC                     | trauma                                                             |
| 31              | 53 years    | F             | IHC                     | unknown                                                            |
| 32              | 54 years    | M             | EM                      | Spontaneous intraventricular hemorrhage from vascular malformation |
| 33              | 55 years    | F             | EM                      | Secondary spontaneous cerebral intraventricular hemorrhage         |
| 34              | 55 years    | M             | IHC, mapping            | heart failure                                                      |
| 35              | 55 years    | M             | IHC                     | liver cancer                                                       |
| 36              | 63 years    | M             | EM                      | pancreatic carcinoma                                               |
| 37              | 77 years    | M             | IHC                     | VHL with hemangiomas                                               |

Supplementary Table 1

**EPILEPSY**

| <b>Case No.</b> | <b>Age</b> | <b>Gender</b> | <b>Experimental Use</b> | <b>Clinical History</b>           |
|-----------------|------------|---------------|-------------------------|-----------------------------------|
| 1               | 3 months   | F             | IHC                     | Epilepsy intraoperative resection |
| 2               | 10 months  | M             | IHC, mapping            | Epilepsy intraoperative resection |
| 3               | 15 months  | M             | IHC                     | Epilepsy intraoperative resection |
| 4               | 2 years    | F             | EM                      | Epilepsy intraoperative resection |
| 5               | 7 years    | M             | IHC, mapping            | Epilepsy intraoperative resection |
| 6               | 7 years    | F             | IHC, EM                 | Epilepsy intraoperative resection |
| 7               | 9 years    | M             | IHC                     | Epilepsy intraoperative resection |
| 8               | 10 years   | M             | IHC                     | Epilepsy intraoperative resection |
| 9               | 11 years   | M             | IHC                     | Epilepsy intraoperative resection |
| 10              | 13 years   | M             | IHC, mapping            | Epilepsy intraoperative resection |
| 11              | 30 years   | F             | IHC and EM              | Epilepsy intraoperative resection |
| 12              | 30 years   | F             | IHC                     | Epilepsy intraoperative resection |
| 13              | 30 years   | M             | EM                      | Epilepsy intraoperative resection |
| 14              | 31 years   | F             | IHC and EM              | Epilepsy intraoperative resection |
| 15              | 32 years   | F             | IHC and EM              | Epilepsy intraoperative resection |
| 16              | 36 years   | F             | IHC and EM              | Epilepsy intraoperative resection |
| 17              | 46 years   | F             | IHC and EM              | Epilepsy intraoperative resection |
| 18              | 47 years   | F             | IHC and EM              | Epilepsy intraoperative resection |
| 19              | 48 years   | M             | IHC and EM              | Epilepsy intraoperative resection |
| 20              | 49 years   | F             | IHC and EM              | Epilepsy intraoperative resection |
| 21              | 59 years   | M             | IHC and EM              | Epilepsy intraoperative resection |
| 22              | 64 years   | M             | IHC and EM              | Epilepsy intraoperative resection |

Supplementary Table 2

| <b>Animal No.</b> | <b>Species</b>    | <b>Age</b> | <b>Sex</b> | <b>Experimental Use</b> |
|-------------------|-------------------|------------|------------|-------------------------|
| 1                 | <i>M. mulatta</i> | E150       | NA         | IHC                     |
| 2                 | <i>M. mulatta</i> | E150       | NA         | IHC                     |
| 3                 | <i>M. mulatta</i> | 0 days     | M          | IHC, EM                 |
| 4                 | <i>M. mulatta</i> | 6 months   | M          | IHC, EM                 |
| 5                 | <i>M. mulatta</i> | 1.5 years  | M          | IHC, EM, BrdU           |
| 6                 | <i>M. mulatta</i> | 1.5 years  | M          | IHC, EM, BrdU           |
| 7                 | <i>M. mulatta</i> | 1.5 years  | M          | IHC, EM, BrdU           |
| 8                 | <i>M. mulatta</i> | 5 years    | M          | IHC, EM                 |
| 9                 | <i>M. mulatta</i> | 7 years    | M          | IHC, EM, BrdU           |
| 10                | <i>M. mulatta</i> | 7.5 years  | F          | IHC, BrdU               |
| 11                | <i>M. mulatta</i> | 22 years   | F          | IHC                     |
| 12                | <i>M. mulatta</i> | 23.6 years | F          | IHC, EM                 |

E=embryonic day

Supplementary Table 3

| <b>Primary Ab</b> | <b>Species</b> | <b>Dilution</b> | <b>Manufacturer</b> | <b>Cat. No.</b> | <b>Antigen Retrieval</b> | <b>Lot No.</b> | <b>Product Notes</b>                                                    |
|-------------------|----------------|-----------------|---------------------|-----------------|--------------------------|----------------|-------------------------------------------------------------------------|
| ALDH1L1           | Mouse          | 1:500           | NeuroMab            | N103/39         | None                     | N103/31        | Species reactivity: Human                                               |
| Ascl1             | Mouse          | 1:500           | BD Pharmingen       | 556604          | 1 min                    | 4169563        | Reactivity: Rat and Mouse; control tests performed on human tissue      |
| Ascl1             | Rabbit         | 1:2000          | Cosmo Bio           | SK-T01-003      | None                     | TAK3-002       | Species Reactivity: Human                                               |
| BLBP              | Rabbit         | 1:200           | EMD Millipore       | ABN14           | 10 min                   | 2299161        | Species Reactivity: Predicted human reactivity based on sequence        |
| BLBP              | Mouse          | 1:200           | Abcam               | ab131137        | 10 min                   | Clone AT1D1    | Species Reactivity: Human                                               |
| BrdU              | Rat            | 1:100           | Accurate Chemical   | OBT0030         | None                     | H9970          | Species reactivity: primate                                             |
| Doublecortin      | Rabbit         | 1:200           | Cell Signaling      | 4604S           | None                     | 42798          | Species Reactivity: Human                                               |
| Doublecortin      | Rabbit         | 1:200           | Abcam               | ab18723         | None                     | GR324492-1     | Species Reactivity: Human                                               |
| Doublecortin      | Guinea pig     | 1:200           | EMD Millipore       | AB2253          | None                     | 2787730        | Species Reactivity: Predicted human reactivity based on sequence        |
| Doublecortin      | Goat           | 1:200           | Santa Cruz          | SC-8066         | None                     | G1408          | Recommended for detection of human doublecortin                         |
| GFAP              | Chicken        | 1:750           | Abcam               | ab4674          | None                     | GR267558-1     | Species Reactivity: Human                                               |
| Hopx              | Rabbit         | 1:200           | Sigma-Aldrich       | HPA030180       | 10 min                   | CC30216        | Species Reactivity: Human                                               |
| Iba1              | Goat           | 1:250           | Novus               | nb100-1028      | None                     | S7C5P2         | Reactivity: Human                                                       |
| Iba1              | Rabbit         | 1:100           | Wako                | 019-1974        | None                     | LKJ2979        | Reactive with human Iba1                                                |
| Ki67              | Mouse          | 1:200           | BD Pharmingen       | 556003          | 10 min                   | 6110925        | QC Testing: Human                                                       |
| Ki67              | Rabbit         | 1:500           | Novocastra          | NCL-Ki67p       | 10 min                   | 6029714        | Specificity: Human Ki67                                                 |
| Ki67              | Rabbit         | 1:1000          | Vector Labs         | VP-K451         | None                     | 6013873        | Specificity: Human Ki67                                                 |
| MCM2              | Goat           | 1:200           | Santa Cruz          | SC-9839         | 10 min                   | D1310          | Recommended for detection of human MCM2                                 |
| Nestin            | Mouse          | 1:250           | Covance             | MMS-570p        | None                     | 14683401       | Reactivity: Human                                                       |
| NeuN              | Chicken        | 1:500           | EMD Millipore       | ABN91           | None                     | 2620673        | Species reactivity: Mouse, rat; control tests performed on human tissue |
| NeuN              | Rabbit         | 1:1000          | Bioscience          | R-3770-100      | None                     | 201605-SH      | Species Reactivity: raised against human Fox3                           |
| NeuroD            | Goat           | 1:500           | Santa Cruz          | SC-1084         | 10 min                   | B0108          | Species Reactivity: Human NeuroD                                        |
| Olig2             | Rabbit         | 1:750           | EMD Millipore       | AB9610          | None                     | 2519344        | Species Reactivity: Human                                               |
| Pax6              | Rabbit         | 1:500           | Covance             | PRB-279p        | 10 min                   | D14BF00330     | Species Reactivity: Extensive; control tests performed on human tissue  |
| Prox1             | Rabbit         | 1:500           | Chemicon            | AB5475          | 8 min                    | LV1354325      | Species Reactivity: Human                                               |
| PSA-NCAM          | Mouse          | 1:500           | Millipore           | MAB5324         | None                     | 2201402        | Species Reactivity: Human                                               |
| Sox1              | Goat           | 1:20            | R&D                 | AF3369          | 8 min                    | XUV0314121     | Species Reactivity: Human                                               |
| Sox1              | Rabbit         | 1:500           | Abcam               | ab87775         | 8 min                    | GR226877-1     | Species Reactivity: Human                                               |
| Sox2              | Goat           | 1:200           | Santa Cruz          | sc-17320        | 10 min                   | H2914          | Species Reactivity: Human Sox2                                          |
| Tbr2              | Rabbit         | 1:1000          | Abcam Inc.          | ab23345         | None                     | GR241522-1     | Species Reactivity: Human                                               |
| Tuj1              | Mouse          | 1:200           | Covance             | MMS-435P        | 10 min                   | TU1            | Species Reactivity: Human                                               |
| Vimentin          | Mouse          | 1:1000          | Sigma-Aldrich       | V5255           | None                     | 045K4826       | Tested in human appendix/ tonsil                                        |

Supplementary Table 4

| <b>#</b> | <b>Species</b>    | <b>Age</b> | <b># BrdU<br/>Injections</b> | <b>Survival time</b> | <b># BrdU+ cells</b> | <b># BrdU+ DCX+ cells</b> | <b># BrdU+ NeuN+<br/>cells</b> |
|----------|-------------------|------------|------------------------------|----------------------|----------------------|---------------------------|--------------------------------|
| 1        | <i>M. mulatta</i> | 1.5 years  | 1                            | 2 hours              | 2.87 ±2.35           | 0                         | 0                              |
| 2        | <i>M. mulatta</i> | 1.5 years  | 10                           | 10 weeks             | 8.97 ±4.33           | 2.67 ±2.30                | 0                              |
| 3        | <i>M. mulatta</i> | 1.5 years  | 10                           | 15 weeks             | 15.22 ±8.52          | 7.2 ±4.6                  | 0.81 ±0.81                     |
| 4        | <i>M. mulatta</i> | 7.5 years  | 10                           | 10 weeks             | 0.44 ±0.05           | 0                         | 0                              |
| 5        | <i>M. mulatta</i> | 7 years    | 10                           | 15 weeks             | 1.17 ±1.46           | 0.07 ±0.26                | 0                              |

## Supplementary Discussion:

Neurogenesis has been shown to continue in adult mammalian brain within two regions V-SVZ and SGZ<sup>36-38</sup>. Young neurons born in the SGZ migrate a short distance and become incorporated in the DG<sup>39</sup>. In contrast, those born in the V-SVZ migrate a long distance to integrate in the olfactory bulb (OB). The extent to which these processes continue in the adult human brain is of considerable interest, given the links to disease, environmental influences, neural plasticity and potentially repair<sup>40,41</sup>. However, the extent to which adult primates<sup>42</sup>, and in particular humans, produce and recruit new neurons in adulthood has been controversial. V-SVZ neurogenesis has been shown to continue postnatally in humans, but greatly declines by 1 year of age and is extremely rare in adults<sup>19,20,43,44</sup>. Evidence for the postnatal recruitment of young neurons has also been obtained in the frontal cortex<sup>19,45</sup>, but this process also declines rapidly during the first few months of life and the time of birth of these neurons remains unknown. In contrast, adult neurogenesis is thought to continue in the human hippocampus. An essential feature of adult neurogenesis in the DG is the formation of a secondary germinal zone containing neural stem cells (NSCs) within the SGZ<sup>23,24</sup>. In the macaque we found that the architecture of the DG shared some features with the rodent, including a proliferative SGZ at juvenile ages and a layer of young neurons. In the human, however, a proliferative niche of stem cells was not observed within the postnatal SGZ. We do not know if the SGZ forms during the intervening times for which we did not have tissue samples. If this were the case, it would mean that the human SGZ is not a long-lived germinal layer. At 7 and 13 years when it would be expected that a germinal zone is set up for life, we did not observe a coalesced, proliferative SGZ. It is also possible that hippocampal neural stem cells in humans remain dispersed in the hilus. However, if these cells continued to generate neurons in adulthood, we would expect to

see migrating young neurons within the hilus on their way to the GCL, which was not the case.

We do not believe that our inability to detect a proliferative SGZ in humans is due to problems with histological preservation. At young ages in the macaque, there were many cells in the DG with an immature phenotype (little cytoplasm and dark nuclei with several nucleoli; see **Extended Data Fig. 9b**), which were detectable with simple nuclear staining; these cells were not detected in the human (see **Extended Data Fig. 2a**). As a comparison to our autopsy samples, we also examined intraoperative surgical resections from individuals with seizures where fixation occurred within minutes of dissection. Seizures can acutely increase proliferation and young neurons in the rodent SGZ<sup>46,47</sup>, but we found no evidence of a discrete layer of dividing cells in the human GCL, the hilus or at its interface in our epileptic cases. Although we could find cells expressing markers of newly formed neurons in the infant and childhood epileptic DG, we did not find these cells in the adult seizure cases. This is consistent with previous reports of decreases in dividing cells, PSA-NCAM+ cells and mature GCL neurons in the epileptic human hippocampus<sup>32,48</sup>. Chronic seizures could deplete the DG of proliferating precursors<sup>49,50</sup>, which could interfere with our ability to detect neurogenesis in surgical samples. However, changes in neurogenesis from chronic epilepsy have been shown to disappear by 6 months<sup>51</sup>, and the reduction in neurogenesis has been linked to impaired neuronal differentiation, not reduced numbers of dividing cells<sup>52</sup>.

One of the earliest studies of adult human DG neurogenesis used a 5 patient cohort that received BrdU and found labeled cells in the GCL<sup>13</sup>. This study quantified BrdU+ cells in different regions of the DG, but it is unclear how many of these labeled cells are neurons. They presented isolated examples of BrdU staining overlapping with NeuN, Calbindin, and neuron

specific enolase (NSE). We do not know if these cells represent rare cases of new neurons that we were unable to reveal in our study, or if they result from BrdU incorporation independent of cell division, or are signals due to the postmortem interval, fixation method, or harsh treatments required for BrdU detection. Intriguingly, these patients received a single dose 1/10th (4-5 mg/Kg) normally used in rodent and monkey studies. We noticed that in our negative controls for BrdU staining in the macaque, or in our non-BrdU treated human tissue, fluorescent round profiles in the SGZ that could be interpreted as labeled cells. Some of this round fluorescence overlapped with DAPI or NeuN (**Extended Data Fig. 7f**). Our BrdU staining in macaques suggests that this method is less sensitive than DCX staining to find the few neurons that continue to be produced after 1.5 years (**Supplementary Table 4**). This is likely due to the long maturation of primate granule neurons providing an extended window of time to detect these adult-born cells by DCX expression. Unfortunately, the tissue treated with BrdU did not have correlative staining with markers of young neurons.

Other studies that immunostained human hippocampus from 11GW to 100 years found evidence for DCX+ cells in all ages studied<sup>14</sup>, with a sharp decline in these cells with age; however, only those cells at the youngest ages had elongated morphology consistent with young neurons. A more recent study finds very few Ki67+ cells or DCX+ cells in the adult human hippocampus consistent with our observations<sup>12</sup>. Additional studies<sup>53,54</sup> report DCX+ cells in the adult human DG; however the examples presented display a round nuclei similar to that seen in mature neurons. Furthermore, as seen in our study and by others, some glial cells may express low levels of DCX<sup>26,55</sup>. Therefore, additional markers, such as PSA-NCAM or TUJ1, are important to confirm the neural identity of DCX+ cells.



A study using  $^{14}\text{C}$  birthdating on sorted NeuN+ nuclei suggested that hundreds of new neurons are generated per day in the adult human hippocampus, with little decline with age<sup>11</sup>. The results obtained from this method differ from the data presented here and other histology studies that show a sharp decline in markers of newly formed neurons during early postnatal development<sup>12,14</sup>. Birthdating with  $^{14}\text{C}$  relies on the isolation of neuronal nuclei using NeuN antibodies, but subpopulations of oligodendrocytes and microglia can also express NeuN<sup>26,55</sup>.  $^{14}\text{C}$  could also possibly become incorporated into DNA through methylation or DNA repair independent of cell division, processes that have been shown to occur at higher rates in the hippocampus<sup>56,57</sup>. The proposed addition of new neurons to the adult caudate nucleus using this method<sup>58</sup> is not supported by other work in the human or BrdU labeling in adult macaques<sup>59</sup>. The  $^{14}\text{C}$  method is an innovative approach to perform birthdating in postmortem human samples, but it has not been validated in animal studies.

In the postnatal human DG, we do not know when DCX+PSA-NCAM+ cells were born. As we do not have samples between 1 and 7 year of age, we cannot report the level of proliferation during this time. We did detect rare Ki67+ cells at 7 years and 13 years of age, but did not find these dividing cells near young neurons, either in the GCL or in the hilus. The DCX+PSA-NCAM+ cells at these ages often expressed NeuN, and had round nuclei, axons, and highly branched dendrites. It may take months, (possibly years) for new neurons in human to mature and they could maintain DCX and/or PSA-NCAM, well into their maturation. This is consistent with the long neuronal maturation time measured in species with large brains such as the sheep<sup>60,61</sup> and the macaque<sup>62</sup> DG. In the setting of a prolonged maturation, young neurons might therefore be more readily detectable by their DCX expression rather than by their isolation as dividing cells.

It is interesting that in other mammals with large brains, such as dolphins and whales, no young neurons were found in their hippocampus. It is possible that brain size<sup>63</sup> or longevity might constrain neurogenesis. Recent work also suggests that adult neural stem cells self-renew for a limited number of times<sup>64</sup> which could limit the process of neurogenesis to a short period of postnatal life. It has also been previously speculated that long term retention of memories might be incompatible with constant neuronal replacement<sup>65</sup>. Our work highlights the need for caution when considering hypotheses that rely on continued hippocampus neurogenesis as a mechanism, such as in the encoding of new memories. Given the broad interest in adult neurogenesis, we hope our work stimulates further work on the unique development, organization, and function of the human dentate gyrus.

### **Supplementary References**

36. Gage, F. H. Neurogenesis in the adult brain. *J. Neurosci.* **22**, 612–613 (2002).
37. Altman, J. The Discovery of Adult Mammalian Neurogenesis. in *Neurogenesis in the Adult Brain* 3–46 (2011).
38. Alvarez-Buylla, A., Seri, B. & Doetsch, F. Identification of neural stem cells in the adult vertebrate brain. *Brain Res. Bull.* **57**, 751–758 (2002).
39. Sun, G. J. *et al.* Tangential migration of neuronal precursors of glutamatergic neurons in the adult mammalian brain. *Proc. Natl. Acad. Sci. U. S. A.* **112**, 9484–9489 (2015).
40. Mu, Y. & Gage, F. H. Adult hippocampal neurogenesis and its role in Alzheimer's disease. *Mol. Neurodegener.* **6**, 85 (2011).
41. Anacker, C. & Hen, R. Adult hippocampal neurogenesis and cognitive flexibility - linking

- memory and mood. *Nat. Rev. Neurosci.* **18**, 335–346 (2017).
42. Rakic, P. PROGRESSNeurogenesis in adult primate neocortex: an evaluation of the evidence. *Nat. Rev. Neurosci.* **3**, 65–71 (2002).
  43. Sanai, N. *et al.* Unique astrocyte ribbon in adult human brain contains neural stem cells but lacks chain migration. *Nature* **427**, 740–744 (2004).
  44. Bergmann, O. *et al.* The age of olfactory bulb neurons in humans. *Neuron* **74**, 634–639 (2012).
  45. Paredes, M. F. *et al.* Extensive migration of young neurons into the infant human frontal lobe. *Science* **354**, (2016).
  46. Parent, J. M. & Murphy, G. G. Mechanisms and functional significance of aberrant seizure-induced hippocampal neurogenesis. *Epilepsia* **49 Suppl 5**, 19–25 (2008).
  47. Parent, J. M. *et al.* Dentate granule cell neurogenesis is increased by seizures and contributes to aberrant network reorganization in the adult rat hippocampus. *J. Neurosci.* **17**, 3727–3738 (1997).
  48. Del Bigio, M. R. Proliferative status of cells in adult human dentate gyrus. *Microsc. Res. Tech.* **45**, 353–358 (1999).
  49. Hu, M. *et al.* Newly generated neurons at 2 months post-status epilepticus are functionally integrated into neuronal circuitry in mouse hippocampus. *Exp. Neurol.* **273**, 273–287 (2015).
  50. Hattiangady, B., Rao, M. S. & Shetty, A. K. Chronic temporal lobe epilepsy is associated with severely declined dentate neurogenesis in the adult hippocampus. *Neurobiol. Dis.* **17**, 473–490 (2004).
  51. Bonde, S., Ekdahl, C. T. & Lindvall, O. Long-term neuronal replacement in adult rat hippocampus after status epilepticus despite chronic inflammation. *Eur. J. Neurosci.* **23**,

- 965–974 (2006).
52. Hattiangady, B. & Shetty, A. K. Decreased neuronal differentiation of newly generated cells underlies reduced hippocampal neurogenesis in chronic temporal lobe epilepsy. *Hippocampus* **20**, 97–112 (2010).
  53. Epp, J. R., Beasley, C. L. & Galea, L. A. Increased hippocampal neurogenesis and p21 expression in depression: dependent on antidepressants, sex, age, and antipsychotic exposure. *Neuropsychopharmacology* **38**, 2297–2306 (2013).
  54. Boekhoorn, K., Joels, M. & Lucassen, P. J. Increased proliferation reflects glial and vascular-associated changes, but not neurogenesis in the presenile Alzheimer hippocampus. *Neurobiol. Dis.* **24**, 1–14 (2006).
  55. Parakalan, R. *et al.* Transcriptome analysis of amoeboid and ramified microglia isolated from the corpus callosum of rat brain. *BMC Neurosci.* **13**, 64 (2012).
  56. Münzel, M. *et al.* Quantification of the sixth DNA base hydroxymethylcytosine in the brain. *Angew. Chem. Int. Ed Engl.* **49**, 5375–5377 (2010).
  57. Guo, J. U., Su, Y., Zhong, C., Ming, G.-L. & Song, H. Hydroxylation of 5-methylcytosine by TET1 promotes active DNA demethylation in the adult brain. *Cell* **145**, 423–434 (2011).
  58. Ernst, A. *et al.* Neurogenesis in the striatum of the adult human brain. *Cell* **156**, 1072–1083 (2014).
  59. Wang, C. *et al.* Human and Monkey Striatal Interneurons Are Derived from the Medial Ganglionic Eminence But Not from the Adult Subventricular Zone. *Journal of Neuroscience* **34**, 10906–10923 (2014).
  60. Brus, M. *et al.* Dynamics of olfactory and hippocampal neurogenesis in adult sheep. *J. Comp. Neurol.* **521**, 169–188 (2013).
  61. Lévy, F., Batailler, M., Meurisse, M. & Migaud, M. Adult Neurogenesis in Sheep:

Characterization and Contribution to Reproduction and Behavior. *Front. Neurosci.* **11**, 570 (2017).

62. Kohler, S. J., Williams, N. I., Stanton, G. B., Cameron, J. L. & Greenough, W. T. Maturation time of new granule cells in the dentate gyrus of adult macaque monkeys exceeds six months. *Proc. Natl. Acad. Sci. U. S. A.* **108**, 10326–10331 (2011).
63. Paredes, M. F., Sorrells, S. F., Garcia-Verdugo, J. M. & Alvarez-Buylla, A. Brain size and limits to adult neurogenesis. *J. Comp. Neurol.* **524**, 646–664 (2016).
64. Encinas, J. M. *et al.* Division-coupled astrocytic differentiation and age-related depletion of neural stem cells in the adult hippocampus. *Cell Stem Cell* **8**, 566–579 (2011).
65. Rakic, P. Limits of neurogenesis in primates. *Science* **227**, 1054–1056 (1985).
